# Supplementary material
Source: PubMed Central journal article supplement (PMC3985768)
Supplement: cm404044n_si_001.pdf [file cm404044n_si_001.pdf]

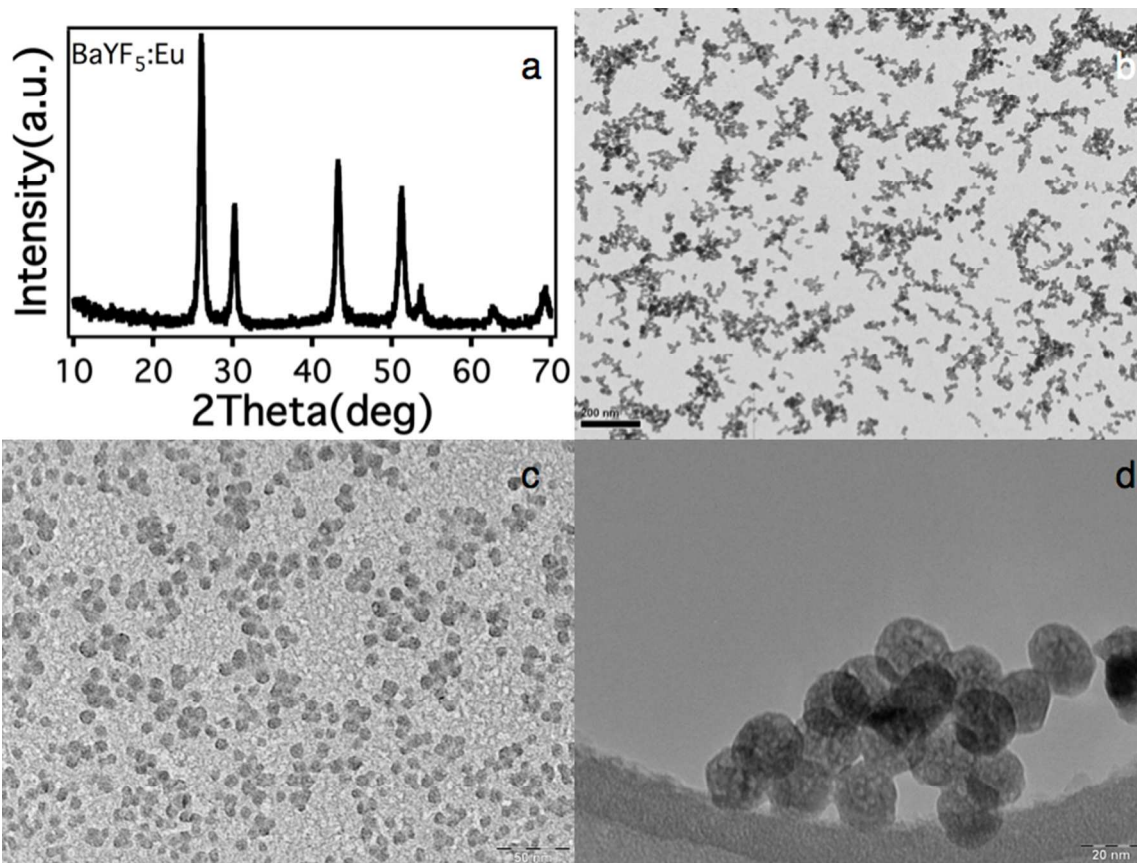

Supplementary Figure S1: a) X-ray diffraction of hydrothermally synthesized BaGdF<sub>5</sub>:10%Eu. TEM micrographs of a) hydrothermally synthesized BaGdF<sub>5</sub>:10%Eu; c) BaGdF<sub>5</sub>:10%Eu synthesized by thermal decomposition; d) Flame synthesized Gd<sub>2</sub>O<sub>3</sub> d).

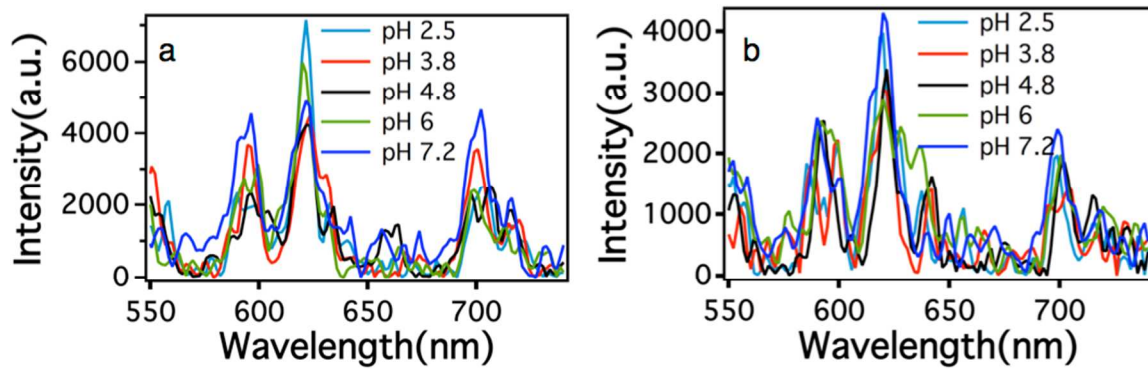

Supplementary Figure S2. X-ray excited luminescence from hexagonal NaGdF<sub>4</sub>:15%Eu at different pHs and at a) 2.5mg/mL and b) 2mg/mL concentrations.

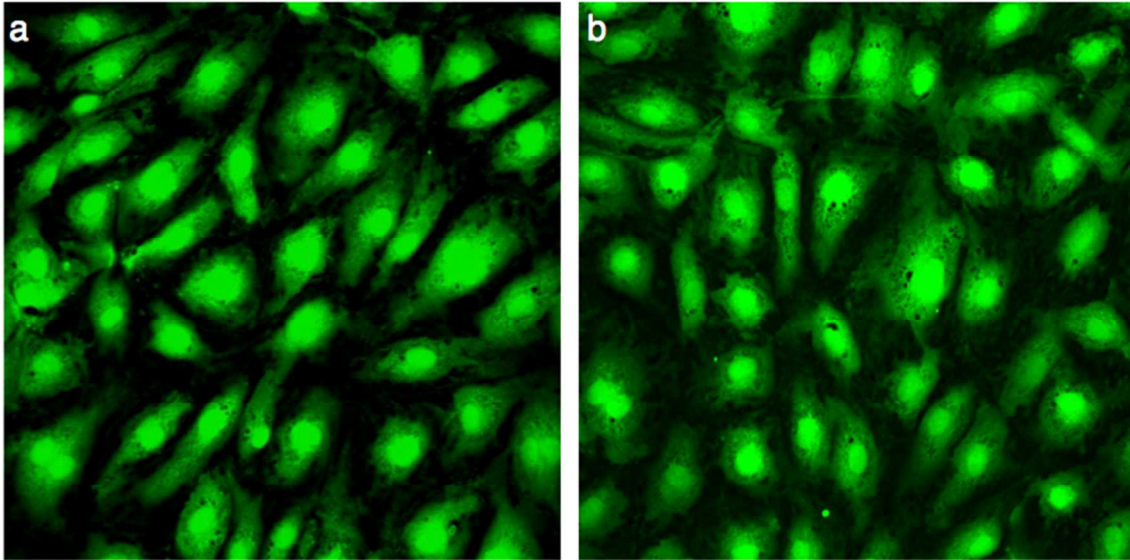

Supplementary Figure S3. Hexagonal  $\text{NaGdF}_4:15\%\text{Eu}$  exposed to human endothelial cells a) Calcein/PI control; b)  $50\mu\text{g}/\text{mL}$  concentration.

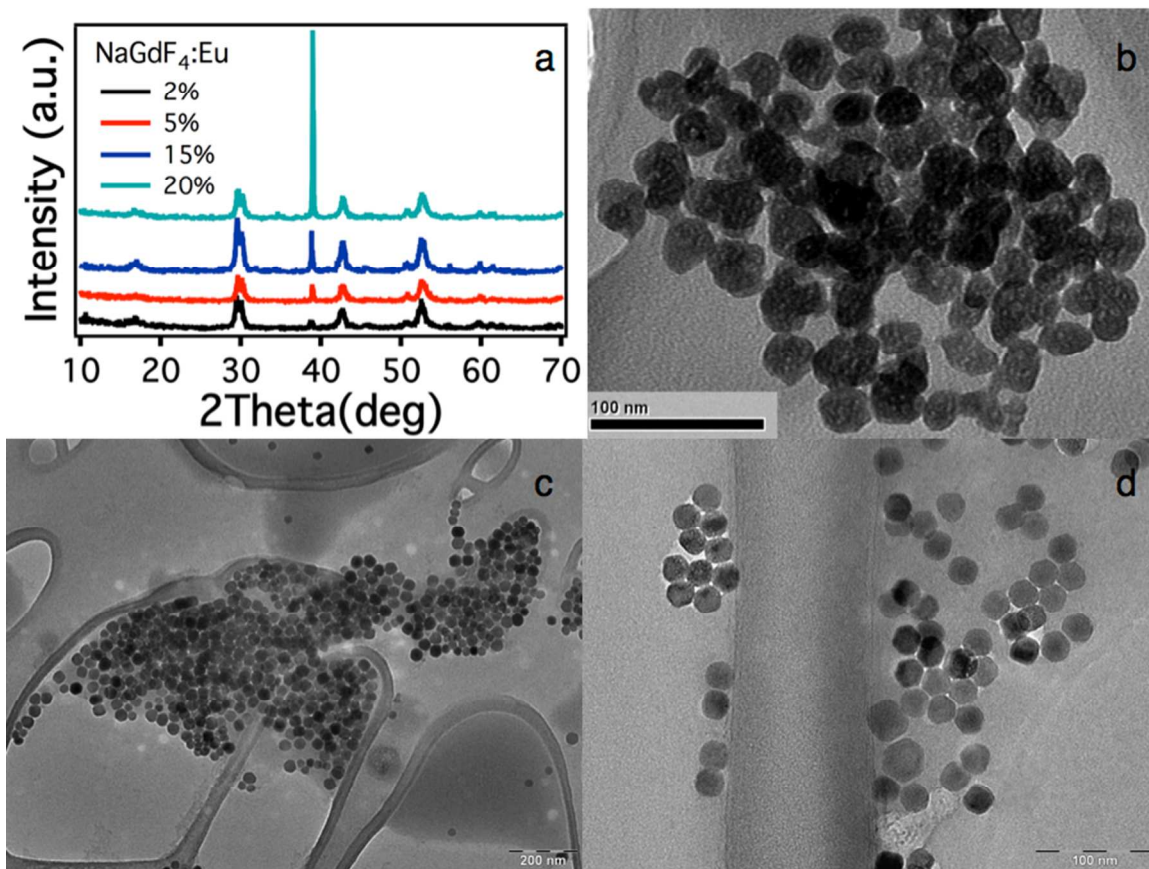

Supplementary Figure S4 X-ray diffraction data for hexagonal NaGdF<sub>4</sub>:Eu (a). TEM micrographs of cubic b) and hexagonal NaGdF<sub>4</sub>:15%Eu c)&d).

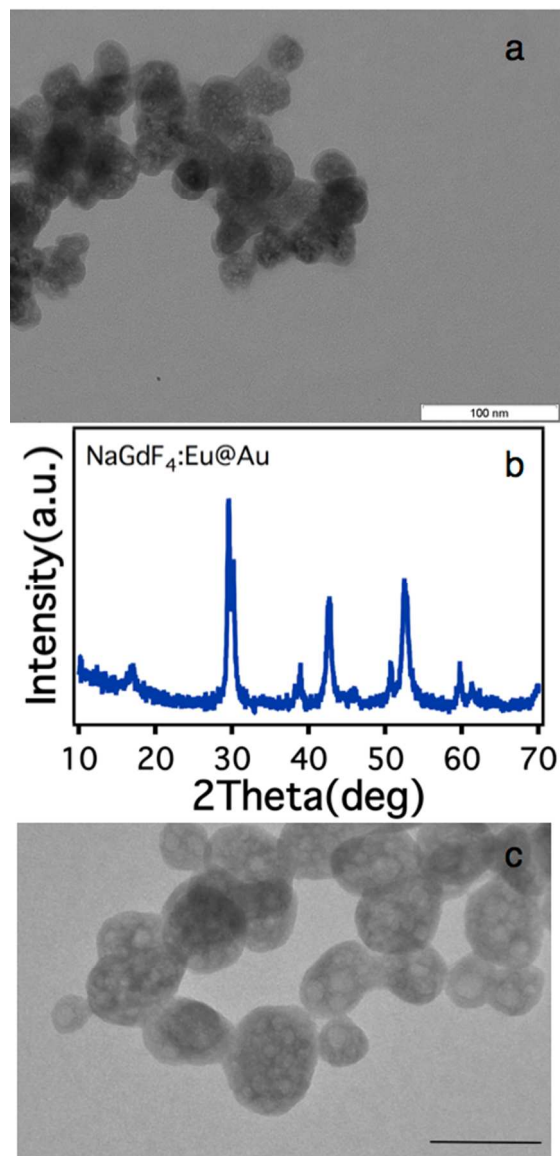

Supplementary Figure S5. TEM image of NaGdF<sub>4</sub>:15%Eu@Au (a). (b) X-ray diffraction micrograph (b) and TEM image (c) of hexagonal NaGdF<sub>4</sub>:15%Eu@Au. The scale bar in (c) corresponds to 50 nm.

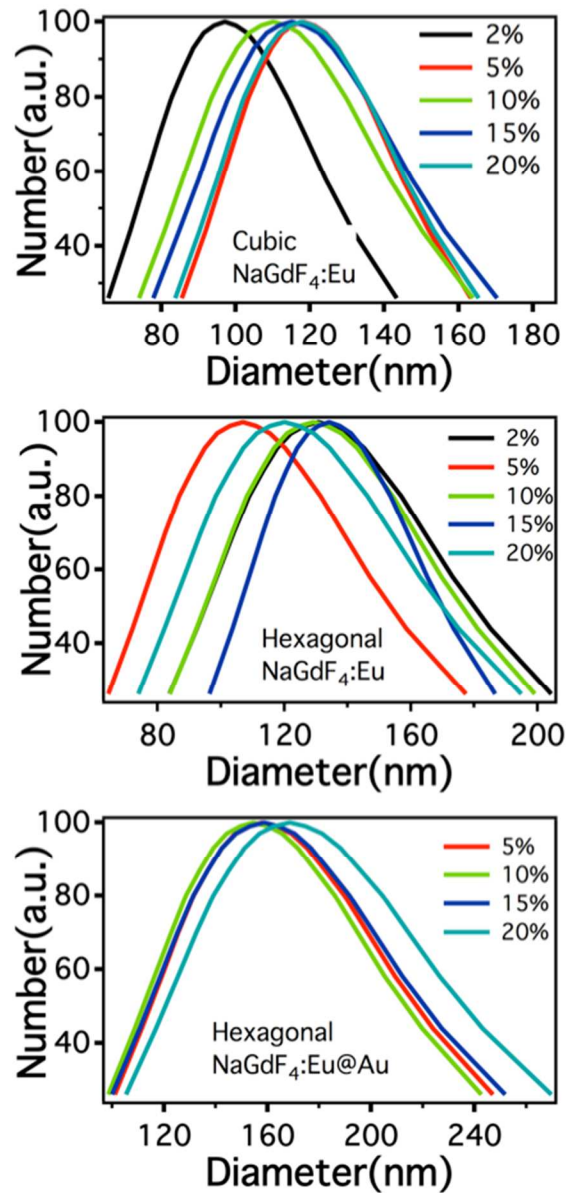

Supplementary Figure S6. Hydrodynamic size distribution of NaGdF<sub>4</sub>:Eu nanoparticles established by dynamic light scattering.



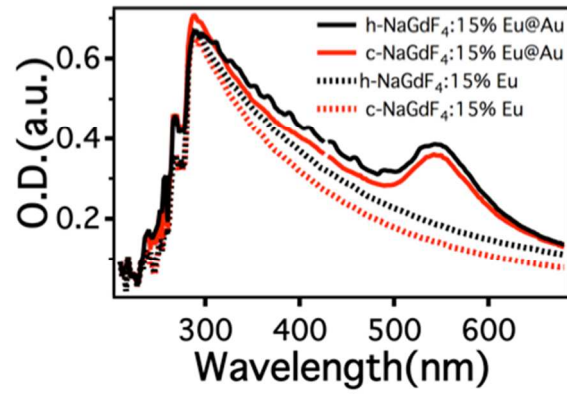

Supplementary Figure S7 Absorbance spectra of cubic and hexagonal nanoparticle solutions of NaGdF<sub>4</sub>:15%Eu and NaGdF<sub>4</sub>:15%Eu@Au (1.5mg/mL).

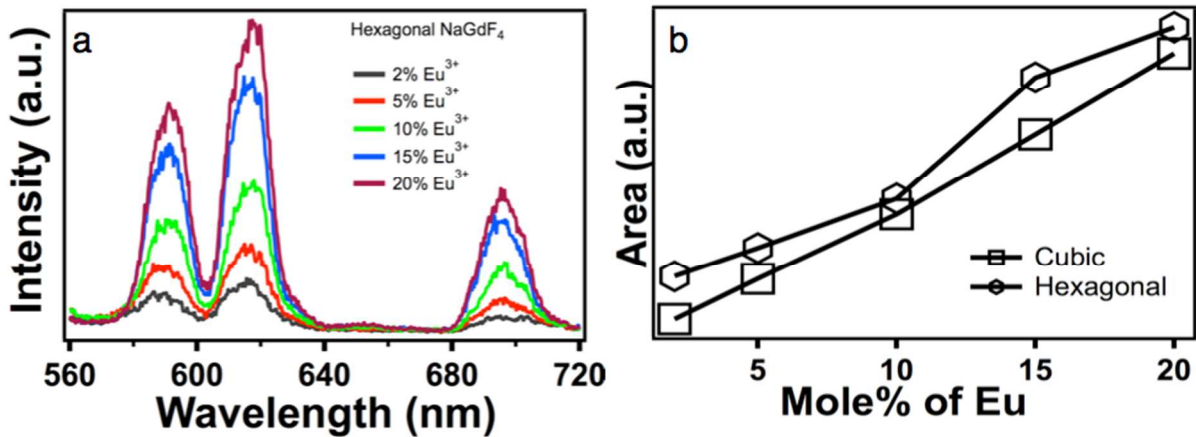

Supplementary Figure S8. Photoluminescence spectra of hexagonal NaGdF<sub>4</sub>:x%Eu (a). Integrated area in the 550 to 750 nm region of the spectra of cubic and hexagonal for different mole% of Eu doped in NaGdF<sub>4</sub>. The concentration of the nanoparticle solution in water was 2.5mg/mL.



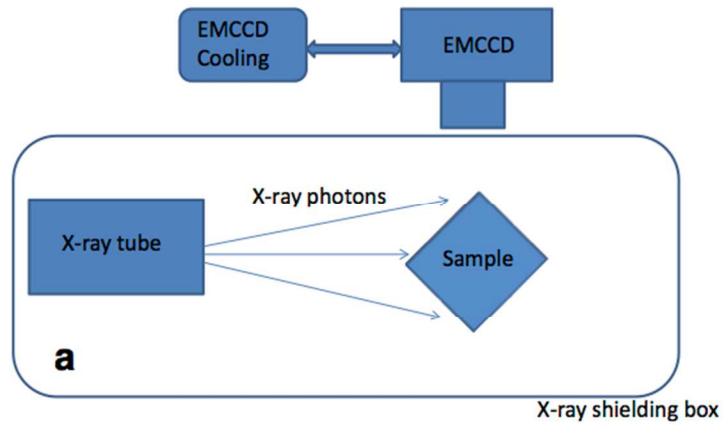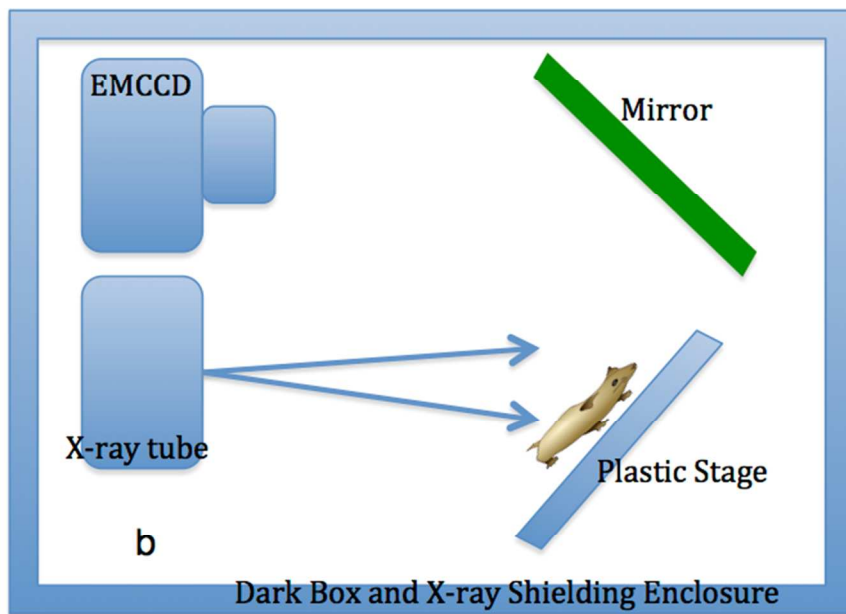

Supplementary Figure S9 Schematic of the X-ray luminescence measurement from (a) cuvette and (b) animal study.
